# Supplementary material for: Alteration of Neutrophil Reactive Oxygen Species Production by Extracts of Devil’s Claw (Harpagophytum)
Source: Hindawi journal article supplement (doi:10.1155/2016/3841803), 2016-01-01
Supplement: f1 [file 3841803.f1.pdf]

# Supplementary file

## Analysis of ascorbate content

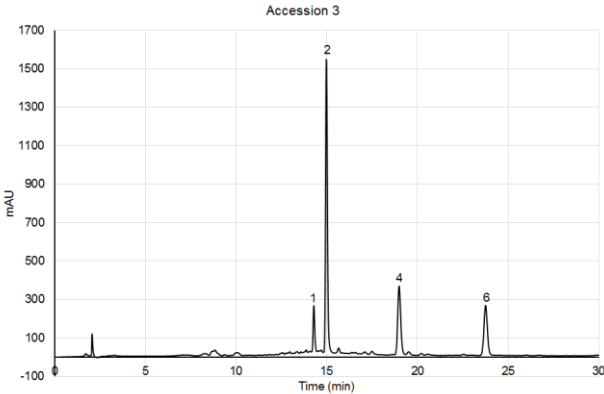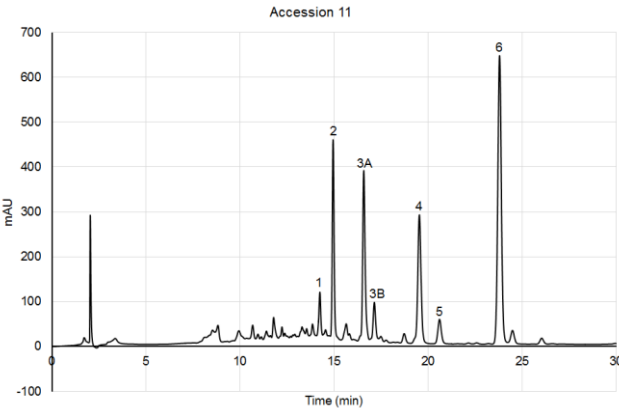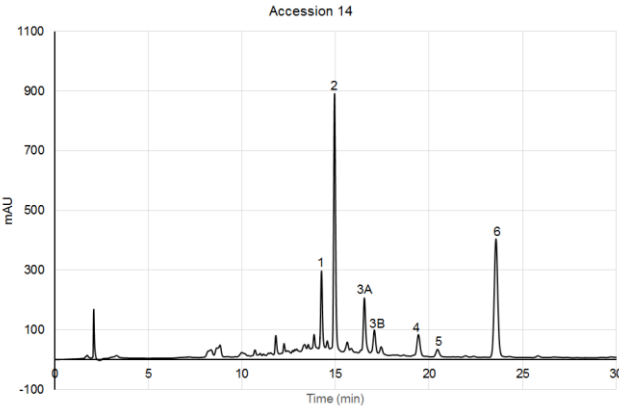

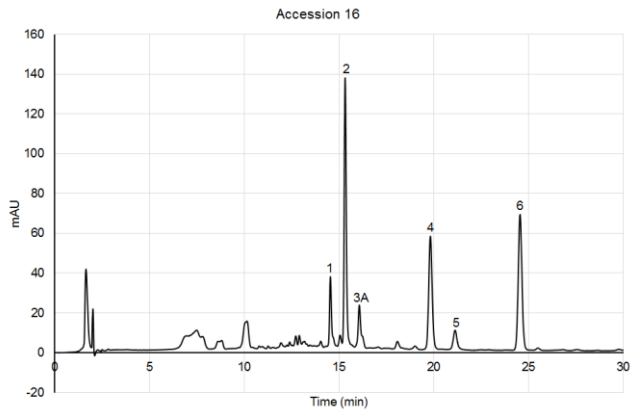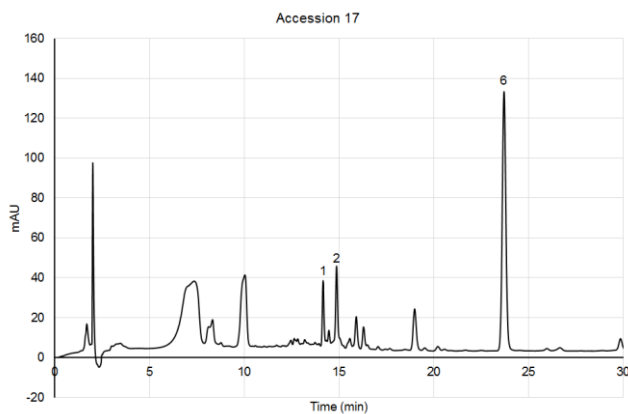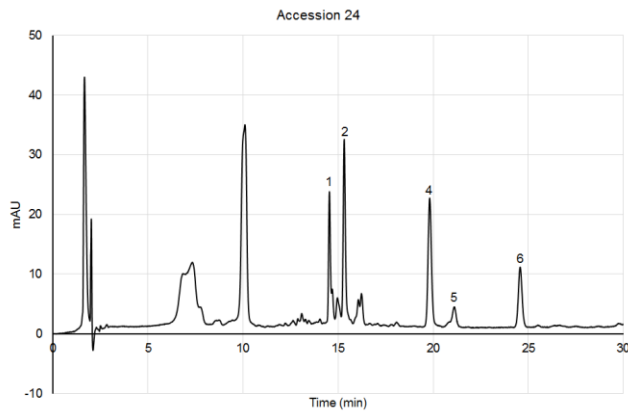

**Supplementary Figure S1.** Representative HPLC-chromatograms for extracts of the six accessions (Accession 3, 11, 14, 16, 17 and 24) selected for biochemical and *in vitro* analyses. Numbers above the peaks in the chromatogram refer to quantified compounds: 1=verbascoside, 2=isoverbascoside, 3A and 3B=8-*O*-*p*-coumaroyl-harpagide, 4=acetylacteoside, 5=pagoside and 6=harpagoside.

Ascorbate 13.1 ug/ml

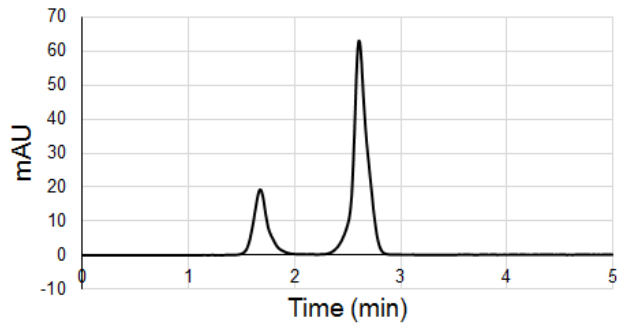

2 % metaphosphoric acid

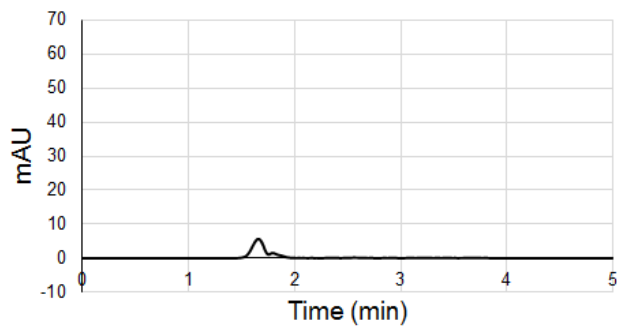

Accession 3

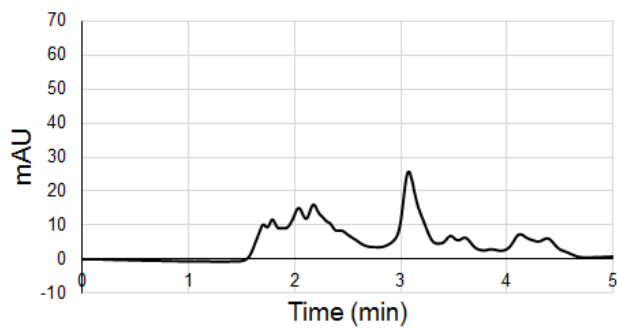

Accession 11

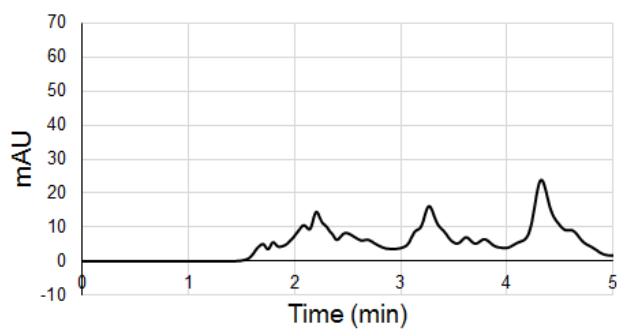

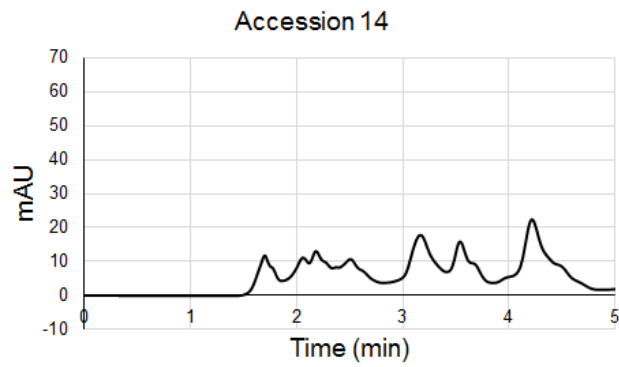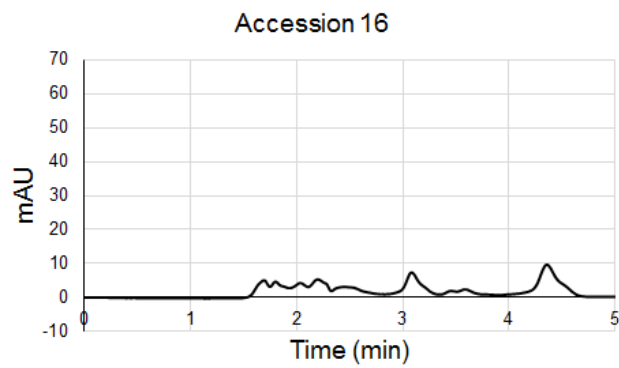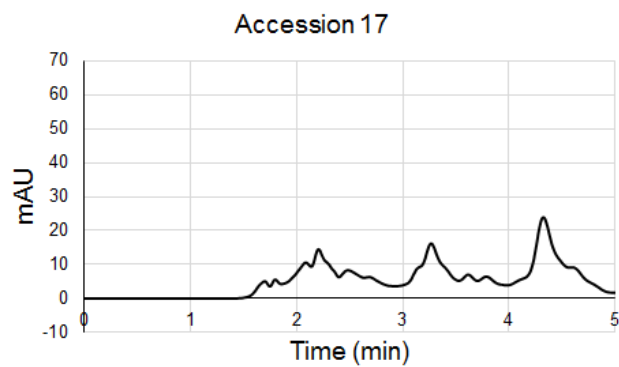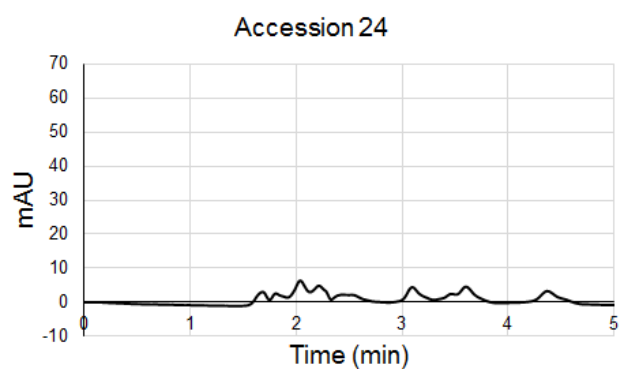

**Supplementary Figure S2.** HPLC analysis of ascorbate in standard, buffer and sample extracts. The retention time for ascorbate was 2.59 min. No ascorbate was found in any of the extracts.

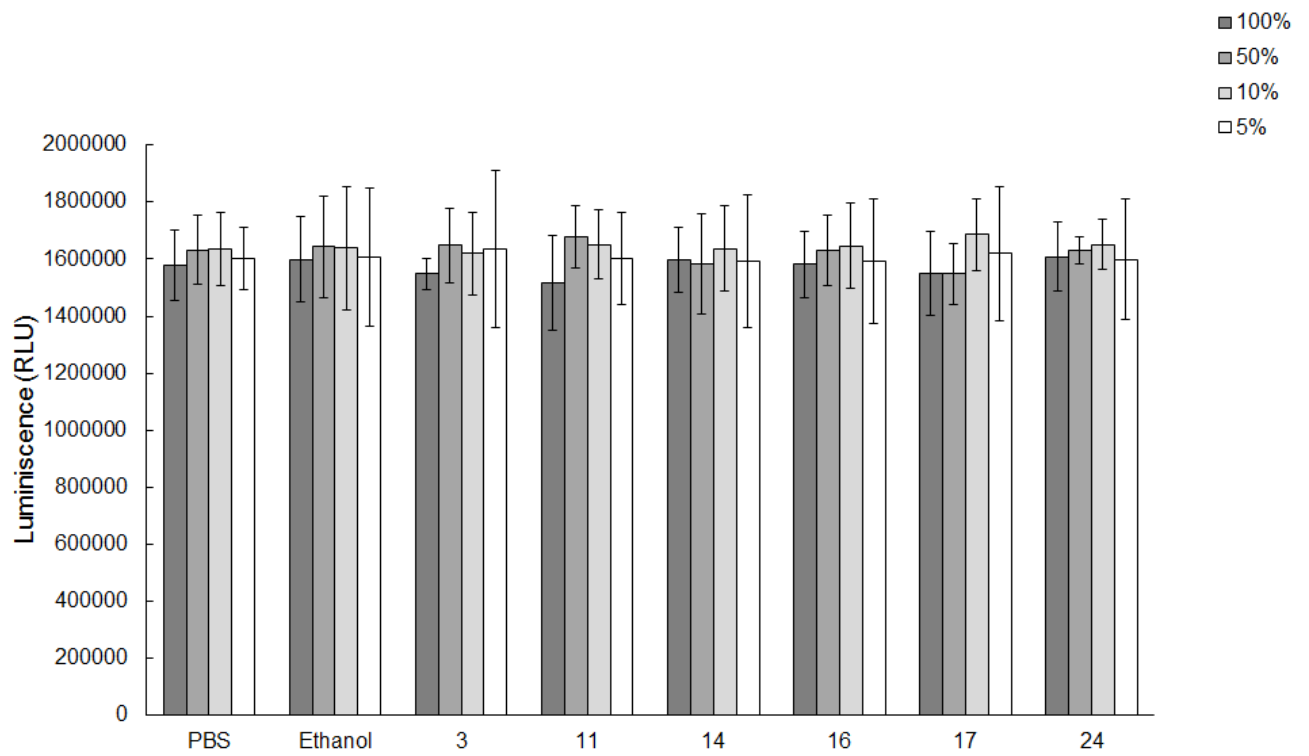

**Supplementary Figure S3.** There were no significant differences among the effects of different extracts on cell viability after incubation with the *Harpagophytum* extracts or control solutions (PBS and ethanol) (n=3). The diagram is illustrating mean values  $\pm$  standard deviation.
